# Supplementary material for: Template-free formation of oriented oxide nanowalls via topotactic-like pseudomorphic transformation: [110]-MgO(111) nanowall arrays
Source: Royal Society of Chemistry journal article supplement (doi:10.1039/d2ma00493c), 2022-01-01
Supplement: d2ma00493c1.pdf [file d2ma00493c1.pdf]

## Supplementary Information

### **Template-free formation of oriented oxide nanowalls via topotactic-like pseudomorphic transformation: [110]-MgO(111) nanowall arrays**

Tsutomu Shinagawa<sup>a,b\*</sup> and Masanobu Izaki<sup>b</sup>

*<sup>a</sup> Electronic Materials Research Division, Morinomiya Centre,  
Osaka Research Institute of Industrial Science and Technology,  
Osaka 536-8553, Japan. \*E-mail: tshina@orist.jp*

*<sup>b</sup> Graduate School of Engineering, Toyohashi University of  
Technology, Toyohashi, Aichi 441-8580, Japan.*

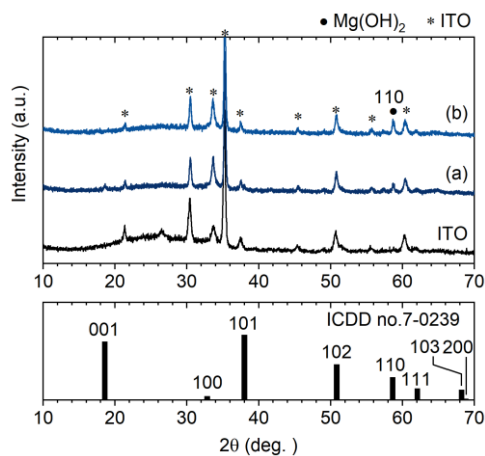

**Figure S1.** XRD patterns of as-deposited Mg(OH)<sub>2</sub> nanowall (NW) arrays electrodeposited on an ITO substrate with controlled grain size: (a) large-grain and (b) small-grain NWs obtained at an initial current density of (a) 0.5 and (b) 4.0 mA cm<sup>-2</sup> for 40 and 5 s, followed by a constant current of 0.2 mA cm<sup>-2</sup> for ~4.2 min, respectively.

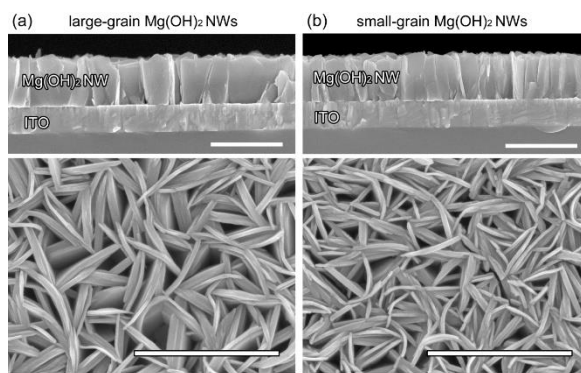

**Figure S2.** Cross-sectional (top) and surface (bottom) FESEM images of as-deposited Mg(OH)<sub>2</sub> nanowall (NW) arrays electrodeposited on an ITO substrate with controlled grain size: (a) large-grain and (b) small-grain NWs obtained at an initial current density of (a) 0.5 and (b) 4.0 mA cm<sup>-2</sup> for 40 and 5 s, followed by a constant current of 0.2 mA cm<sup>-2</sup> for ~4.2 min, respectively.

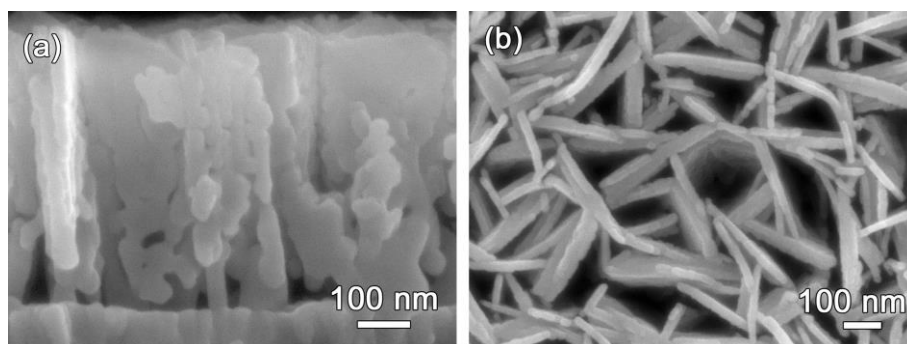

**Figure S3.** (a) Cross-sectional and (b) surface FESEM images of MgO nanowalls obtained by heating Mg(OH)<sub>2</sub> NWs at 800 °C for 2 h in air.

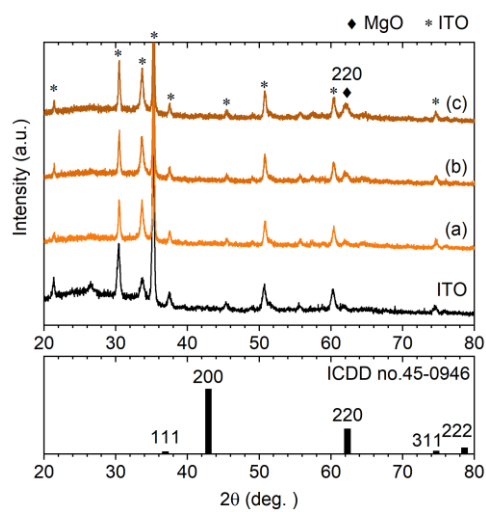

**Figure S4.** XRD patterns of MgO NWs obtained by heating Mg(OH)<sub>2</sub> NWs at 500 °C for 2 h in air: the electrodeposition time of Mg(OH)<sub>2</sub> is (a) 1.7, (b) 4.2 and (c) 8.3 min.
